# Supplementary material
Source: Springer Nature journal article supplement (https://www.springermedizin.de/resource/supplementary/12981_2010_179_MOESM6_ESM.pdf/9604046)

**A.** $r=0.7234$ ;  $p=0.0003$ 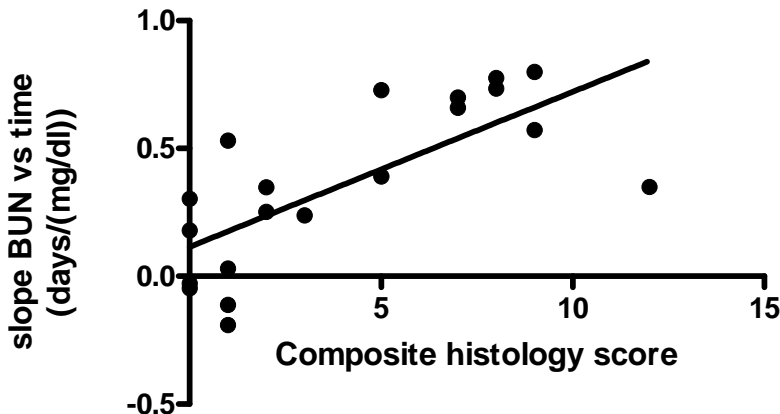**B.** $r=0.4631$ ;  $p=0.0398$ 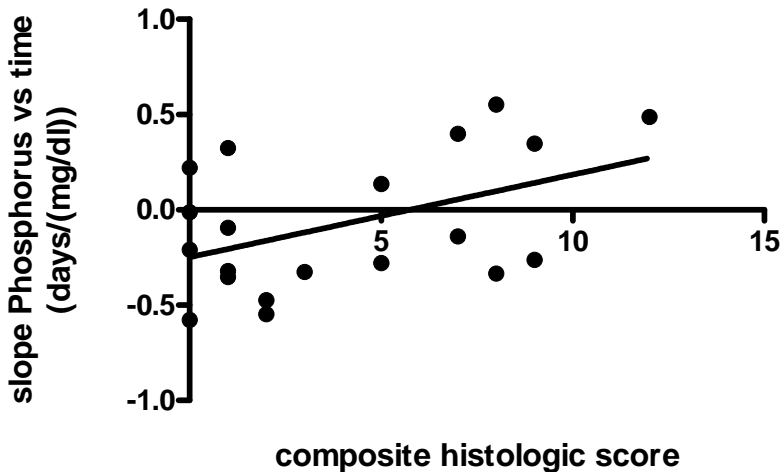

Supplement: MOESM6 [file 9604046]
